# Supplementary material for: Deep Learning for the Prediction of the Survival of Midline Diffuse Glioma with an H3K27M Alteration
Source: MDPI journal article supplement (doi:10.3390/brainsci13101483), 2023-10-19
Supplement: s1 [file s1]

Table S2. Optimal hyperparameters of DeepSurv and N-MTLR models.

| Parameter                                              | DeepSurv                          | N-MTLR model                     |
|--------------------------------------------------------|-----------------------------------|----------------------------------|
| Neural Network structure<br>(Layer: activation; nodes) | 1: Softsign; 27<br>2: CosReLU; 45 | 1: Atan; 84<br>2: LogSigmoid; 20 |
| Optimizer                                              | rmsprop                           | sgd                              |
| Batch Normalization                                    | False                             | False                            |
| Learning Rate                                          | 0.00018                           | 0.00062                          |
| Number of Epochs                                       | 2106                              | 88                               |
| Dropout                                                | 0.4                               | 0.2                              |
| L2 Regularization                                      | 0.0082                            | 0.0064                           |
| L2 Smoothing Regularization                            |                                   | 0.0023                           |
| Bins                                                   |                                   | 52                               |
