# Supplementary material for: Deep Learning for the Prediction of the Survival of Midline Diffuse Glioma with an H3K27M Alteration
Source: MDPI journal article supplement (doi:10.3390/brainsci13101483), 2023-10-19
Supplement: s1 [file s1]

Table S1. The comparison of clinical information between the two groups.

| Variable                   | Training set<br>n=113 | Test set<br>N=23  | P value            |
|----------------------------|-----------------------|-------------------|--------------------|
| Age (Mean $\pm$ SD)        | 23.04 $\pm$ 16.84     | 34.39 $\pm$ 17.27 | 0.004 <sup>a</sup> |
| Gender                     |                       |                   | 0.222 <sup>a</sup> |
| Male                       | 53(46.9%)             | 14(60.9%)         |                    |
| Female                     | 60(53.1%)             | 9(39.1%)          |                    |
| Tumor size                 |                       |                   | 0.796 <sup>a</sup> |
| $\geq$ 1mm                 | 11(9.7%)              | 1(4.4%)           |                    |
| $\geq$ 2mm                 | 13(11.5%)             | 3(13.0%)          |                    |
| $\geq$ 3mm                 | 53(46.9%)             | 10(43.5%)         |                    |
| $\geq$ 4mm                 | 36(31.9%)             | 9(39.1%)          |                    |
| Tumor location             |                       |                   | 0.409 <sup>a</sup> |
| Thalamus                   | 46(40.7%)             | 14(60.9%)         |                    |
| Midbrain                   | 4(3.5%)               | 1(4.3%)           |                    |
| Pontine                    | 42(37.2%)             | 5(21.7%)          |                    |
| Medulla                    | 3(2.7%)               | 1(4.3%)           |                    |
| Basal ganglia              | 18(15.9%)             | 2(8.7%)           |                    |
| Extent of resection        |                       |                   | 0.125 <sup>a</sup> |
| GTR                        | 21(18.6%)             | 9(39.1%)          |                    |
| STR                        | 28(24.8%)             | 4(17.4%)          |                    |
| PR                         | 54(47.8%)             | 7(30.4%)          |                    |
| Biopsy                     | 10(8.8%)              | 3(13.1%)          |                    |
| Pre-op KPS (Mean $\pm$ SD) | 71.15 $\pm$ 17.10     | 74.35 $\pm$ 15.62 | 0.409              |
| Enhancement                |                       |                   | 0.637 <sup>a</sup> |
| Yes                        | 65(57.5%)             | 12(52.2%)         |                    |
| No                         | 48(42.5%)             | 11(47.8%)         |                    |
| Radiotherapy               |                       |                   | 0.020 <sup>a</sup> |
| Yes                        | 31(27.4%)             | 12(52.2%)         |                    |
| No                         | 82(72.6%)             | 11(47.8%)         |                    |
| Chemotherapy               |                       |                   | 0.303 <sup>a</sup> |
| Yes                        | 32(28.3%)             | 9(39.1%)          |                    |
| No                         | 81(71.7%)             | 14(60.9%)         |                    |
| ATRX expression            |                       |                   | 0.022 <sup>b</sup> |
| Yes                        | 77(68.1%)             | 12(52.1%)         |                    |
| No                         | 26(23.0%)             | 11(47.9%)         |                    |
| Missing                    | 10(8.9%)              | 0                 |                    |
| P53 positive               |                       |                   | 1.000 <sup>b</sup> |
| Yes                        | 80(70.8%)             | 19(82.6%)         |                    |

|                                 |                  |                  |                    |
|---------------------------------|------------------|------------------|--------------------|
| No                              | 17(15.0%)        | 4(17.4%)         |                    |
| Missing                         | 16(14.2%)        | 0                |                    |
| Ki67 expression (Mean $\pm$ SD) | 0.25 $\pm$ 0.15  | 0.20 $\pm$ 0.14  | 0.240              |
| MGMT promoter methylation       |                  |                  | 0.817 <sup>b</sup> |
| Methylated                      | 20(17.7%)        | 6(26.1%)         |                    |
| Unmethylated                    | 64(56.7%)        | 17(73.9%)        |                    |
| Missing                         | 29(25.6%)        | 0                |                    |
| Status                          |                  |                  | 0.877 <sup>a</sup> |
| Dead                            | 102(90.3%)       | 21(91.3%)        |                    |
| Alive                           | 11(9.7%)         | 2(8.7%)          |                    |
| Survival time (Mean $\pm$ SD)   | 9.41 $\pm$ 12.11 | 10.37 $\pm$ 8.78 | 0.719              |

<sup>a</sup> is for Chi-square test, <sup>b</sup> is for Fisher's exact test.
