# Supplementary material for: Deep Learning for the Prediction of the Survival of Midline Diffuse Glioma with an H3K27M Alteration
Source: MDPI journal article supplement (doi:10.3390/brainsci13101483), 2023-10-19
Supplement: s1 [file s1]

Table S3. Optimal hyperparameters of Random Survival Forest.

| Parameter           | Random Survival Forest Model |
|---------------------|------------------------------|
| Trees               | 216                          |
| Max Features        | sqrt                         |
| Min Node Size       | 80                           |
| Sample Size Percent | 80%                          |
| Importance Mode     | Normalized Permutation       |
